# Supplementary material for: Electropolymerization using binuclear nickel(ii) Schiff base complexes bearing N4O4donors as supramolecular building blocks
Source: Royal Society of Chemistry journal article supplement (doi:10.1039/c5ra03414k), 2015-01-01
Supplement: c5ra03414k1.pdf [file c5ra03414k1.pdf]

Electronic Supplementary Information

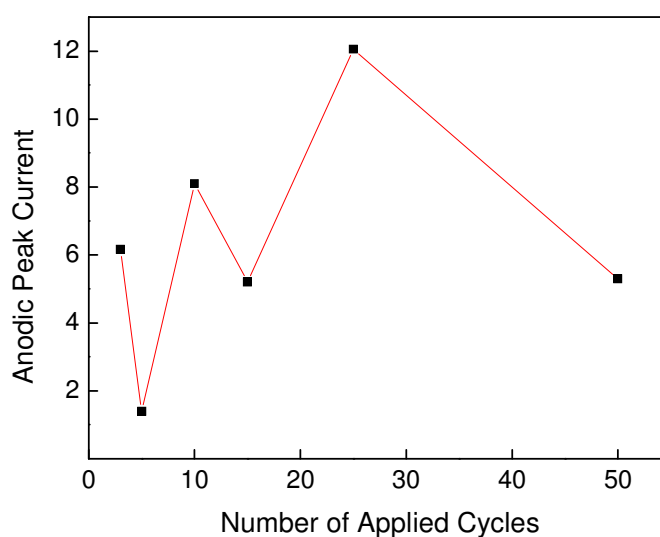

**Figure 1S** – Anodic peak current in function of number of applied cycles on electropolymerization step. Peak current of the coated electrode was obtained in aqueous solution (KCl 0.5 mol L<sup>-1</sup>).

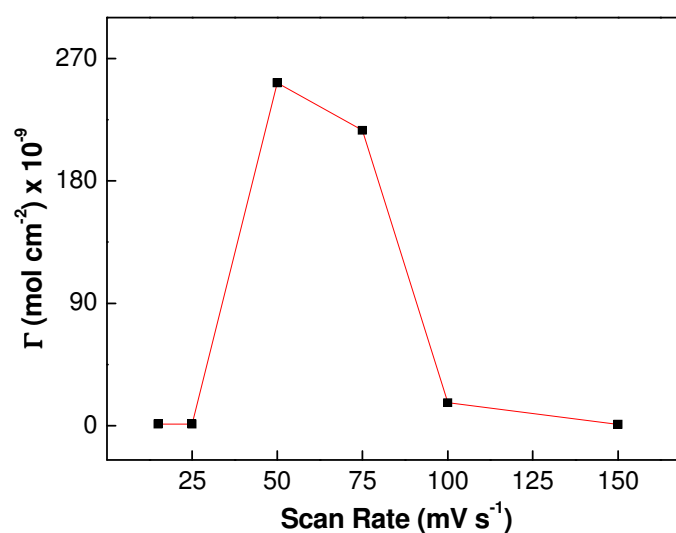

**Figure 2S** – Surface coverage values in function of scan rate used on electropolymerization stage.

**Table S2** – Values of anodic potential observed to poly[Ni<sub>2</sub>(*bisalphen*)] obtained in different scan rate used on electropolymerization

| Scan Rate of Electropolymerization (mV s <sup>-1</sup> ) | Peak potential (E/ mV) <sup>a</sup> |      |     | $\Gamma$ (mol cm <sup>-2</sup> ) <sup>b</sup> |
|----------------------------------------------------------|-------------------------------------|------|-----|-----------------------------------------------|
|                                                          | I                                   | II   | III |                                               |
| 15                                                       | - 586                               | -86* | 456 | 1.25 x 10 <sup>-9</sup>                       |
| 25                                                       | -415                                | 37*  | 542 | 1.28 x 10 <sup>-9</sup>                       |
| 50                                                       | -567                                | -370 | 436 | 2.52 x 10 <sup>-7</sup>                       |
| 75                                                       | -434                                | -    | 452 | 2.17 x 10 <sup>-7</sup>                       |
| 100                                                      | -509*                               | -342 | 552 | 1.70 x 10 <sup>-8</sup>                       |
| 150                                                      | -631                                | -74* | -   | 8.65 x 10 <sup>-10</sup>                      |

\*potential peak with low current values; <sup>a</sup>potential values *versus* SCE; <sup>b</sup> values canceled to first anodic peak from Equation 1.

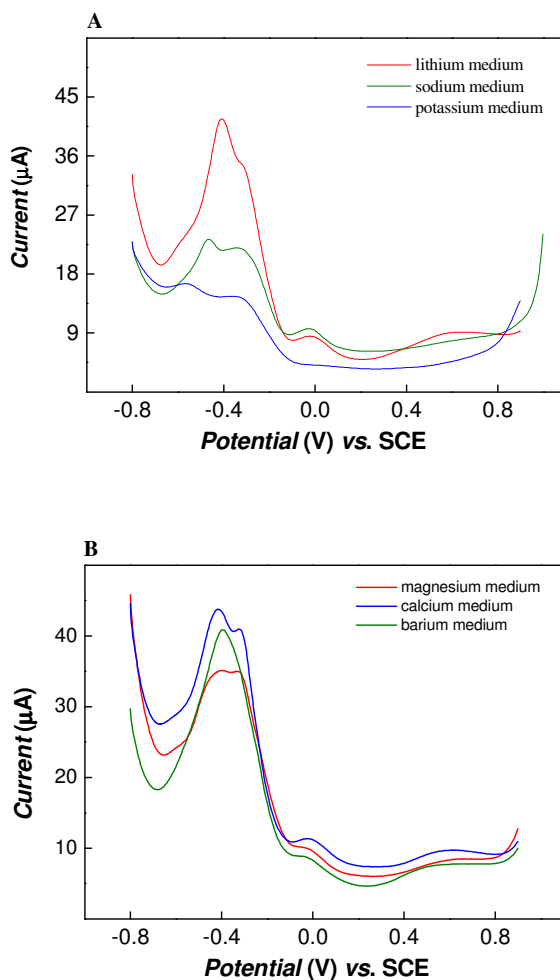

**Figure 2S** – Differential pulse voltammogram of poly[Ni<sub>2</sub>(*bisalphen*)] modified electrode in presence of different cations: (A) alkaline and (B) alkaline earth. (pulse = 50 mV; scan rate = 5 mV s<sup>-1</sup>).
